# Supplementary material for: Explainable Machine Learning Approach as a Tool to Understand Factors Used to Select the Refractive Surgery Technique on the Expert Level
Source: PubMed Central journal article supplement — Transl Vis Sci Technol. 2020 Feb 12;9(2):8. doi: 10.1167/tvst.9.2.8 (PMC7346876; doi:10.1167/tvst.9.2.8), 2020-02-12

## Supplemental materials

# Explainable machine learning approach as a tool to understand factors used to select the refractive surgery technique on the expert level

---

**Supplementary Table 1.** Questionnaire survey conducted during a preoperative evaluation. The patients determined their anticipated surgical options after fully consulted on the surgery options by an expert advisor.

**Supplementary Table 2.** Subjects' data variables used to construct machine learning models.

**Supplementary Table 3.** Detailed calculation methods of multi-categorical classification metrics including accuracy, relative classifier information (RCI), and Cohen's kappa.

**Supplementary Table 4.** Characteristics of the subjects in this study for training and validation data.

**Supplementary Figure 1.** Schematic illustration showing a multiclass one-versus-rest (OVR) classifier.

**Supplementary Figure 2.** Schematic illustration showing a multiclass one-versus-one (OVO) classifier.

**Supplementary Figure 3.** Schematic diagram to compare the primary factors between the explainable XGBoost model and clinician's decision.

**Supplementary Figure 4.** SHAP clustering force plots using the one-versus-rest XGBoost models.

**Supplementary Figure 5.** Examples of the features with a correlation analysis.

**Supplementary Figure 6.** Examples of the features with the highest importance calculated by XGBoost for two surgeons. Each machine learning model was built by one expert for each unique patient group.

**Supplementary Table 1.** Questionnaire survey conducted during a preoperative evaluation. The patients determined their anticipated surgical options after fully consulted on the surgery options by an expert advisor.

**Name:**

**Patient ID:**

**Age:**

**Gender: Male / Female**

**Please select items on the panel. You can select multiple items.**

| Order | Question                                                                     | Answer 01                                                            | Answer 02                                  | Answer 03                   | Answer 04                            | Answer 05          | Answer 06 |
|-------|------------------------------------------------------------------------------|----------------------------------------------------------------------|--------------------------------------------|-----------------------------|--------------------------------------|--------------------|-----------|
| 1     | What was the method to correct your vision? (You can select multiple items.) | Glasses                                                              | Hard lens                                  | Soft lens                   | None                                 |                    |           |
| 2     | What kind of occupation you have? (You can select multiple items.)           | Sports                                                               | Smartphone or Computer (more than 5 hours) | Driving (more than 2 hours) |                                      |                    |           |
| 3     | What kind of surgery option you anticipate? (You can select multiple items.) | LASIK                                                                | LASEK                                      | SMILE                       | ICL                                  | None               |           |
| 4     | What is your anticipated recovery time? (Select one item.)                   | One day                                                              | 3 days                                     | 1 week                      | 1 month                              | None               |           |
| 5     | What is your plan after surgery? (You can select multiple items.)            | Study abroad                                                         | Employment                                 | Military service            | Other surgery                        | None               |           |
| 6     | What is major concerns about surgery? (You can select multiple items.)       | Complications                                                        | Changing visual acuity                     | Management during recovery  | Recovery duration                    | Budget for surgery |           |
| 7     | How uncomfortable do your dry eye symptoms make you? (Select one item.)      | Severe                                                               | Moderate                                   | Mild                        | None                                 |                    |           |
| 8     | Please select your past history. (You can select multiple items.)            | Metabolic disease such as diabetes, hypertension, or thyroid disease | Glaucoma or Retinal disorders              | Keloid or Atopic dermatitis | Recent delivery (within 3~12 months) | Other diseases     | None      |

The questionnaire survey was originally written in Korean language and this is a translated version.

**Supplementary Table 2.** Subjects' data variables used to construct machine learning models.

| Category              | Total number | Features                                                                                                                                                                                                                                                                                                                                                                                                                                                                                                                                                                                                                                                                                                                                                                                                                                                                                                                                                                                                                                                                                                                                                                                                                                                                                                                                                                                                                                                              |
|-----------------------|--------------|-----------------------------------------------------------------------------------------------------------------------------------------------------------------------------------------------------------------------------------------------------------------------------------------------------------------------------------------------------------------------------------------------------------------------------------------------------------------------------------------------------------------------------------------------------------------------------------------------------------------------------------------------------------------------------------------------------------------------------------------------------------------------------------------------------------------------------------------------------------------------------------------------------------------------------------------------------------------------------------------------------------------------------------------------------------------------------------------------------------------------------------------------------------------------------------------------------------------------------------------------------------------------------------------------------------------------------------------------------------------------------------------------------------------------------------------------------------------------|
| Demographics & Survey | 40           | Age (continuous)<br>Sex (binary)<br>Before_Surgery_Glasses (binary)<br>Before_Surgery_Hard_Lens (binary)<br>Before_Surgery_Soft_Lens (binary)<br>Before_Surgery_None (binary)<br>Occupation_Sports (binary)<br>Occupation_Driver (binary)<br>Occupation_Computer_or_Smartphone (binary)<br>Anticipated_Surgery_LASIK (binary)<br>Anticipated_Surgery_LASEK (binary)<br>Anticipated_Surgery_SMILE (binary)<br>Anticipated_Surgery_ICL (binary)<br>Anticipated_Surgery_None (binary)<br>Anticipated_Recovery_One_Day (binary)<br>Anticipated_Recovery_Three_Days (binary)<br>Anticipated_Recovery_One_Week (binary)<br>Anticipated_Recovery_One_Month (binary)<br>Anticipated_Recovery_None (binary)<br>Plan_After_Surgery_Study_Abroad (binary)<br>Plan_After_Surgery_Employment (binary)<br>Plan_After_Surgery_Military (binary)<br>Plan_After_Surgery_Surgery (binary)<br>Plan_After_Surgery_None (binary)<br>Concern_Complication (binary)<br>Concern_Visual_Acuity (binary)<br>Concern_Management (binary)<br>Concern_Recovery (binary)<br>Concern_Money (binary)<br>Concern_None (binary)<br>Dry_Eye_Symptom_Severe (binary)<br>Dry_Eye_Symptom_Moderate (binary)<br>Dry_Eye_Symptom_Mild (binary)<br>Dry_Eye_Symptom_None (binary)<br>History_Metabolic_Disease (binary)<br>History_Glaucoma_Or_Retinal_Disorder (binary)<br>History_Keloid_Or_Atopic_Dermatitis (binary)<br>History_Recent_Delivery (binary)<br>History_Other (binary)<br>History_None (binary) |

**Supplementary Table 2.** Subjects' data variables used to construct machine learning models.  
(continued)

| Category                                        | Total number        | Features                                                                                                                                                                                                                                                                                                                                                                                                                                                                                                                                                                                                                                                                                                                                                                                                                                                                                                                                                                                                                                                                                                                                                                                                                                                                                                                                                                                                                                                                                                                                                                                                                                                                                                                                                              |
|-------------------------------------------------|---------------------|-----------------------------------------------------------------------------------------------------------------------------------------------------------------------------------------------------------------------------------------------------------------------------------------------------------------------------------------------------------------------------------------------------------------------------------------------------------------------------------------------------------------------------------------------------------------------------------------------------------------------------------------------------------------------------------------------------------------------------------------------------------------------------------------------------------------------------------------------------------------------------------------------------------------------------------------------------------------------------------------------------------------------------------------------------------------------------------------------------------------------------------------------------------------------------------------------------------------------------------------------------------------------------------------------------------------------------------------------------------------------------------------------------------------------------------------------------------------------------------------------------------------------------------------------------------------------------------------------------------------------------------------------------------------------------------------------------------------------------------------------------------------------|
| Corneal tomography<br>- Pentacam<br>(both eyes) | 80                  | Pentacam_Pupil_Diameter (continuous)<br>Pentacam_Anterior_Chamber_Depth (continuous)<br>Pentacam_Angle (continuous)<br>Pentacam_Chamber_Volume (continuous)<br>Pentacam_Keratometric_Power_Deviation (continuous)<br>Pentacam_Corea_Volume (continuous)<br>Pentacam_K_Max_y (continuous)<br>Pentacam_K_max_x (continuous)<br>Pentacam_K_max_pachy (continuous)<br>Pentacam_Thinnest_Y (continuous)<br>Pentacam_Thinnest_X (continuous)<br>Pentacam_Thinnest_CCT (continuous)<br>Pentacam_Pachy_Apex_Y_Position (continuous)<br>Pentacam_Pachy_Apex_X_Position (continuous)<br>Pentacam_Pachy_Apex_CCT (continuous)<br>Pentacam_Pupil_Center_Y (continuous)<br>Pentacam_Pupil_Center_X (continuous)<br>Pentacam_Pupil_Center_CCT (continuous)<br>Pentacam_Corneal_Back_Rmin (continuous)<br>Pentacam_Corneal_Back_Rper (continuous)<br>Pentacam_Corneal_Back_ecc (continuous)<br>Pentacam_Corneal_Back_Astig (continuous)<br>Pentacam_Corneal_Back_Axis (continuous)<br>Pentacam_Corneal_Back_K_mean (continuous)<br>Pentacam_Corneal_Back_R_mean (continuous)<br>Pentacam_Corneal_Back_K2 (continuous)<br>Pentacam_Corneal_Back_R_Vertical (continuous)<br>Pentacam_Corneal_Back_K1 (continuous)<br>Pentacam_Corneal_Back_R_Horizontal (continuous)<br>Pentacam_Corneal_Front_Rmin (continuous)<br>Pentacam_Corneal_Front_Rper (continuous)<br>Pentacam_Corneal_Front_ecc (continuous)<br>Pentacam_Corneal_Front_Astig (continuous)<br>Pentacam_Corneal_Front_Axis (continuous)<br>Pentacam_Corneal_Front_K_mean (continuous)<br>Pentacam_Corneal_Front_R_mean (continuous)<br>Pentacam_Corneal_Front_K2 (continuous)<br>Pentacam_Corneal_Front_R_Vertical (continuous)<br>Pentacam_Corneal_Front_K1 (continuous)<br>Pentacam_Corneal_Front_R_Horizontal (continuous) |
| Ophthalmic<br>examination<br>(both eyes)        | 22                  | Spherical_Equivalent (continuous)<br>Spherical_Diopter (continuous)<br>Cylinder_Diopter (continuous)<br>Cylinder_Axis (continuous)<br>CDVA (logMAR) (continuous)<br>Pupil_Diameter (continuous)<br>IOP (continuous)<br>CCT (continuous)<br>Anterior_Chamber_Depth (continuous)<br>WTW (continuous)<br>NIBUT (continuous)                                                                                                                                                                                                                                                                                                                                                                                                                                                                                                                                                                                                                                                                                                                                                                                                                                                                                                                                                                                                                                                                                                                                                                                                                                                                                                                                                                                                                                              |
| <b>Total</b>                                    | <b>142 features</b> |                                                                                                                                                                                                                                                                                                                                                                                                                                                                                                                                                                                                                                                                                                                                                                                                                                                                                                                                                                                                                                                                                                                                                                                                                                                                                                                                                                                                                                                                                                                                                                                                                                                                                                                                                                       |

**Supplementary Table 3.** Detailed calculation methods of multi-categorical classification metrics including accuracy, relative classifier information (RCI), and Cohen's kappa.

|                 |                                                                                                                                                                                                                                                                                                                                                                                                                                                                                                                                                                                                                                                                                                                              |
|-----------------|------------------------------------------------------------------------------------------------------------------------------------------------------------------------------------------------------------------------------------------------------------------------------------------------------------------------------------------------------------------------------------------------------------------------------------------------------------------------------------------------------------------------------------------------------------------------------------------------------------------------------------------------------------------------------------------------------------------------------|
| <b>Accuracy</b> | <p>Accuracy is a standard metric for evaluation of a classifier. It is defined as follows:</p> $Accuracy = \frac{\sum_i q_{ii}}{\sum_{ij} q_{ij}}$ <p>where the element <math>q_{ij}</math> refers to the number of test times and test input actually labeled <math>C_i</math> is <math>C_j</math> noted by the classifier, and these elements organize the confusion matrix. Although it is easy to notice the accuracy, it cannot give full accounts on the actual performance in multi-categorical problems.</p>                                                                                                                                                                                                         |
| <b>RCI</b>      | <p>The RCI is an entropy-based measure applicable to multi-categorical decision problems. This quantifies how much uncertainty of classification had been reduced by a machine learning classifier. It is defined as follows:</p> $RCI = \sum_i -\frac{\sum_j q_{ij}}{\sum_{ij} q_{ij}} \log \left( \frac{\sum_j q_{ij}}{\sum_{ij} q_{ij}} \right) - \sum_j \left( \frac{\sum_i q_{ij}}{\sum_{ij} q_{ij}} \times \sum_i -\frac{q_{ij}}{\sum_i q_{ij}} \log \left( \frac{q_{ij}}{\sum_i q_{ij}} \right) \right)$ <p>where <math>\log</math> refers to natural logarithm transformation. RCI represents the performance with unbalanced classes capable of distinguishing among different misclassification distributions.</p> |
| <b>Kappa</b>    | <p>Cohen's kappa is an alternative to classification rate that compensates for random hits. It is defined as follows:</p> $Kappa = \frac{\sum_{ij} q_{ij} \times \sum_i q_{ii} - \sum_{ij} (\sum_i q_{ij} \times \sum_j q_{ij})}{(\sum_{ij} q_{ij})^2 - \sum_{ij} (\sum_i q_{ij} \times \sum_j q_{ij})}$ <p>Kappa is a standard meter for a multi-categorical problem generally applied in several fields such as brain-computer interface.</p>                                                                                                                                                                                                                                                                              |

**Supplementary Table 4.** Characteristics of the subjects in this study for training and validation data.

| Variable                              | Training set<br>(N=10,561) | Internal validation set<br>(N=2,640) | External validation<br>set (N=5,279) | P Value <sup>a</sup> |
|---------------------------------------|----------------------------|--------------------------------------|--------------------------------------|----------------------|
| Age (years)                           | 27.94 ± 6.12               | 27.89 ± 6.10                         | 26.23 ± 6.51                         | <.001                |
| Sex, female (%)                       | 5,609 (53.1)               | 1,374 (52.0)                         | 2,879 (54.5)                         | .081                 |
| Spherical equivalent<br>(Diopter)     | -4.56 ± 2.24               | -4.55 ± 2.20                         | -4.80 ± 2.28                         | <.001                |
| CDVA (logMAR)                         | -0.015 ± 0.042             | -0.016 ± 0.043                       | 0.001 ± 0.041                        | <.001                |
| IOP (mmHg)                            | 15.20 ± 4.81               | 15.25 ± 5.47                         | 15.16 ± 3.06                         | .008                 |
| Central corneal thickness<br>(µm)     | 541.86 ± 31.54             | 541.82 ± 31.93                       | 542.80 ± 33.38                       | .070                 |
| NIBUT (s)                             | 6.87 ± 6.60                | 6.90 ± 6.67                          | 6.83 ± 5.93                          | <.001                |
| Corneal refractive surgery            |                            |                                      |                                      |                      |
| LASIK                                 | 3,630 (34.4)               | 914 (34.6)                           | 1,579 (29.9)                         | <.001                |
| LASEK                                 | 2,891 (27.4)               | 729 (27.6)                           | 1,273 (24.1)                         | <.001                |
| SMILE                                 | 3,036 (28.7)               | 746 (28.3)                           | 2,052 (38.8)                         | <.001                |
| Contraindication cases for<br>surgery | 1,004 (9.5)                | 251 (9.5)                            | 375 (7.1)                            | <.001                |

Abbreviations: CDVA, corrected distance visual acuity; IOP, intraocular pressure; LASEK, laser epithelial keratomileusis; LASIK, laser in situ keratomileusis; NIBUT, non-invasive break-up time; SMILE, small incision lenticule extraction.

<sup>a</sup> Comparison using the Kruskal-Wallis test and Chi-square test.

**Supplementary Figure 1.** Schematic illustration showing a multiclass one-versus-rest (OVR) classifier.

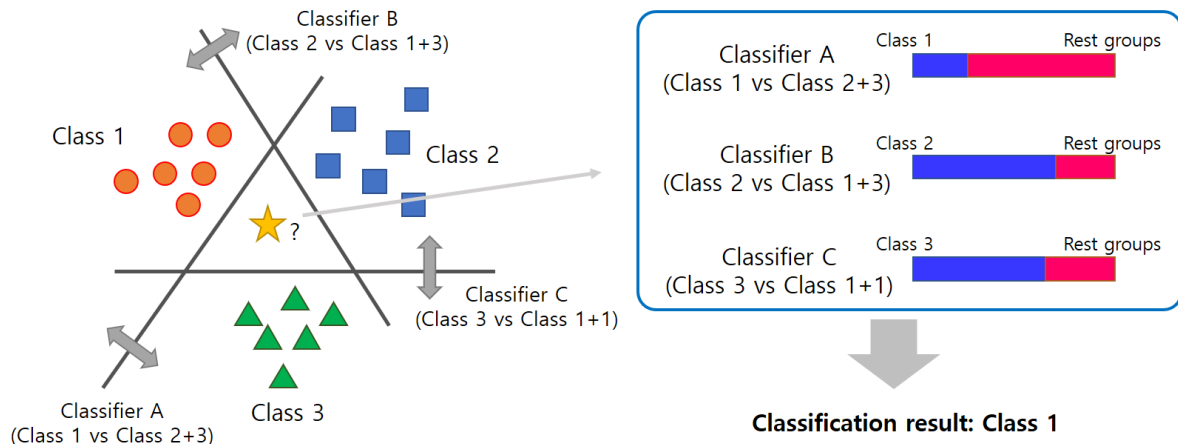

**Supplementary Figure 2.** Schematic illustration showing a multiclass one-versus-one (OVO) classifier.

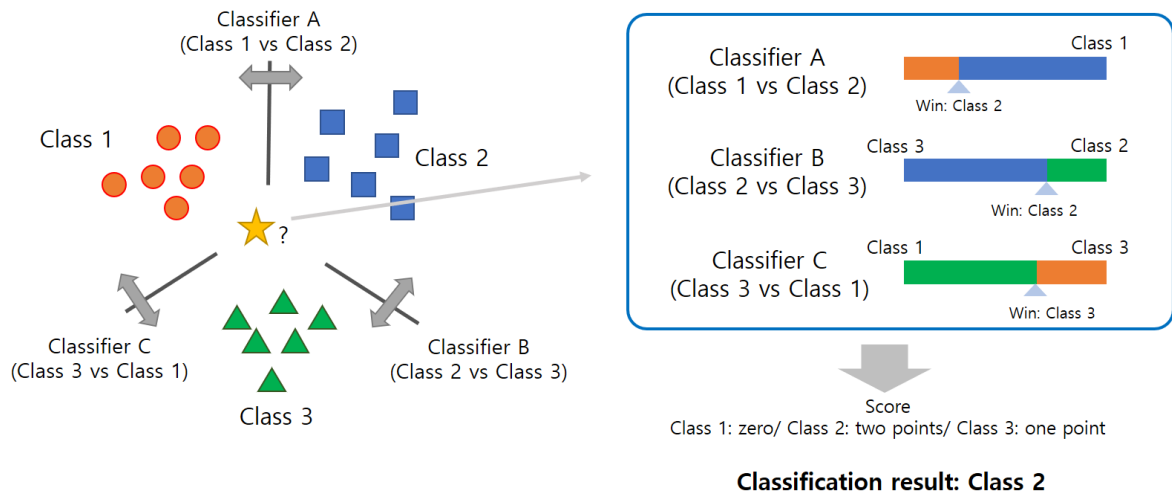



**Supplementary Figure 3.** Schematic diagram to compare the primary factors between the explainable XGBoost model and clinician's decision.

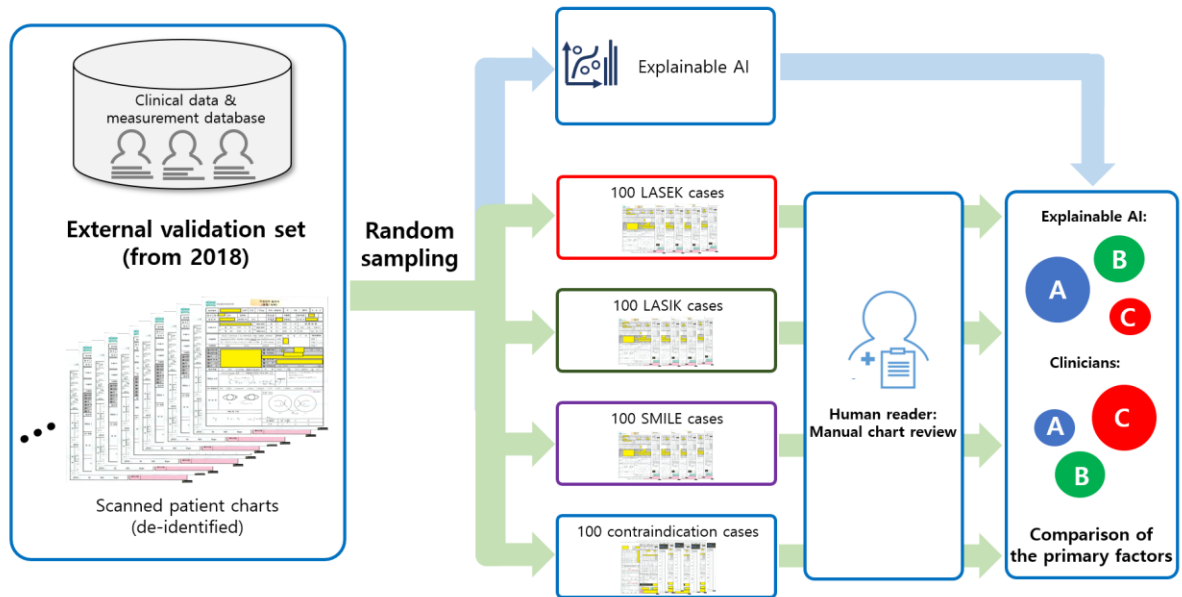

Supplementary Figure 4. SHAP clustering force plots using the one-versus-rest XGBoost models.

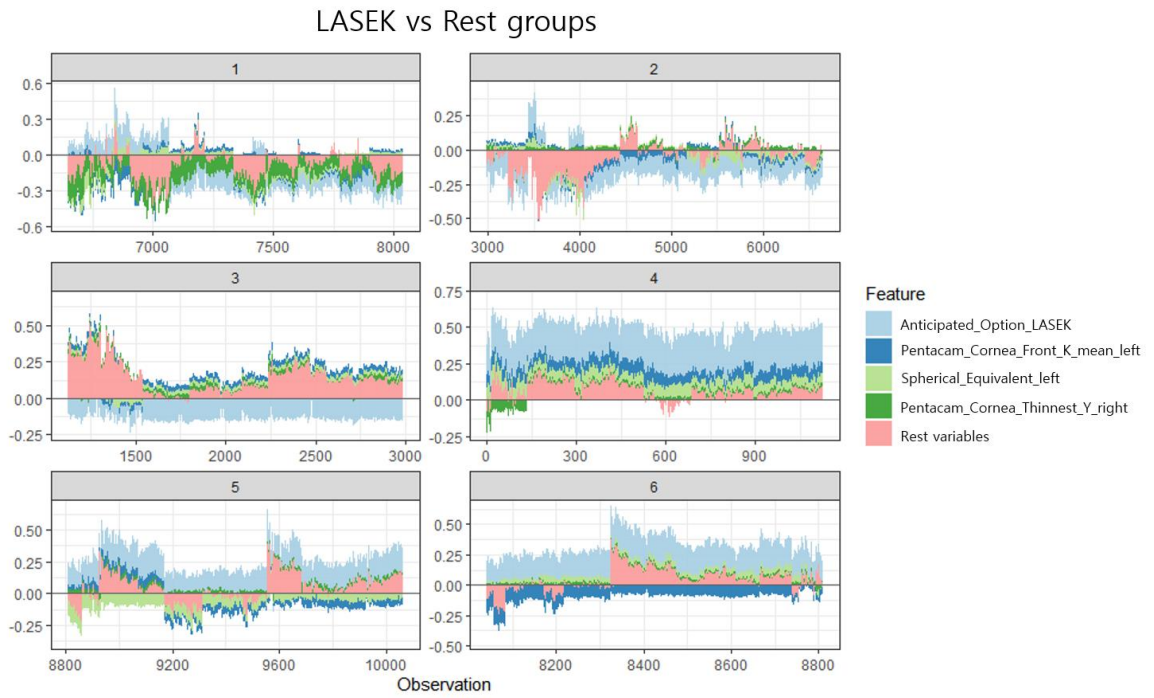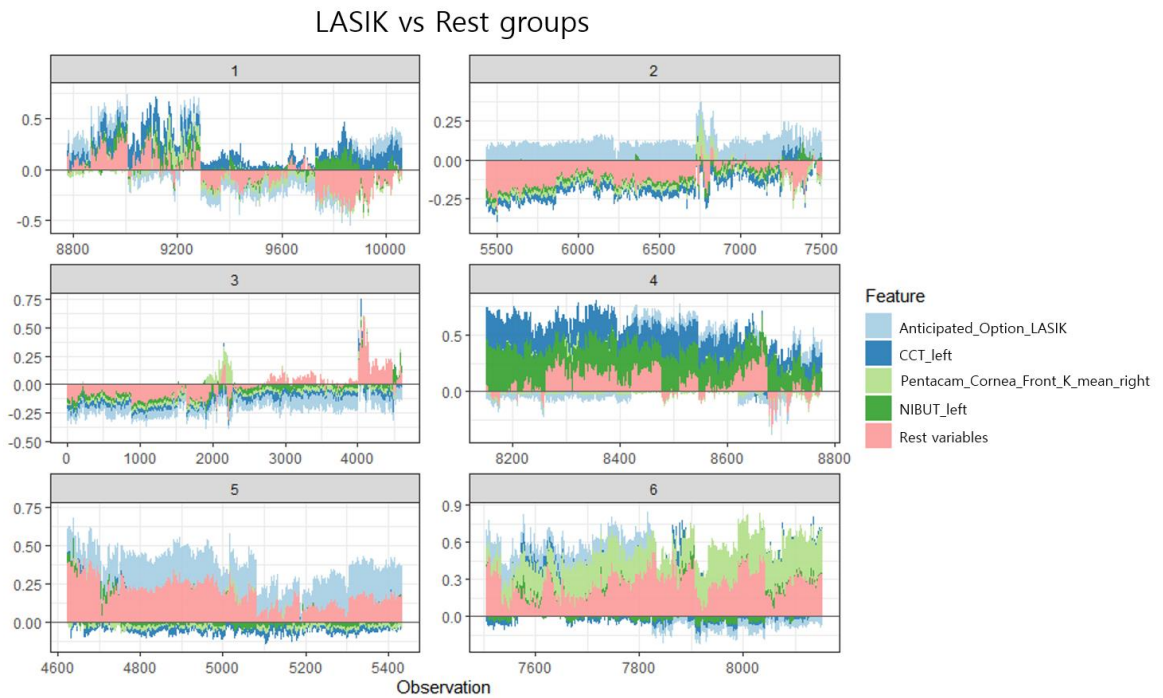

Supplementary Figure 4. SHAP clustering force plots using the one-versus-rest XGBoost models.

(continued)

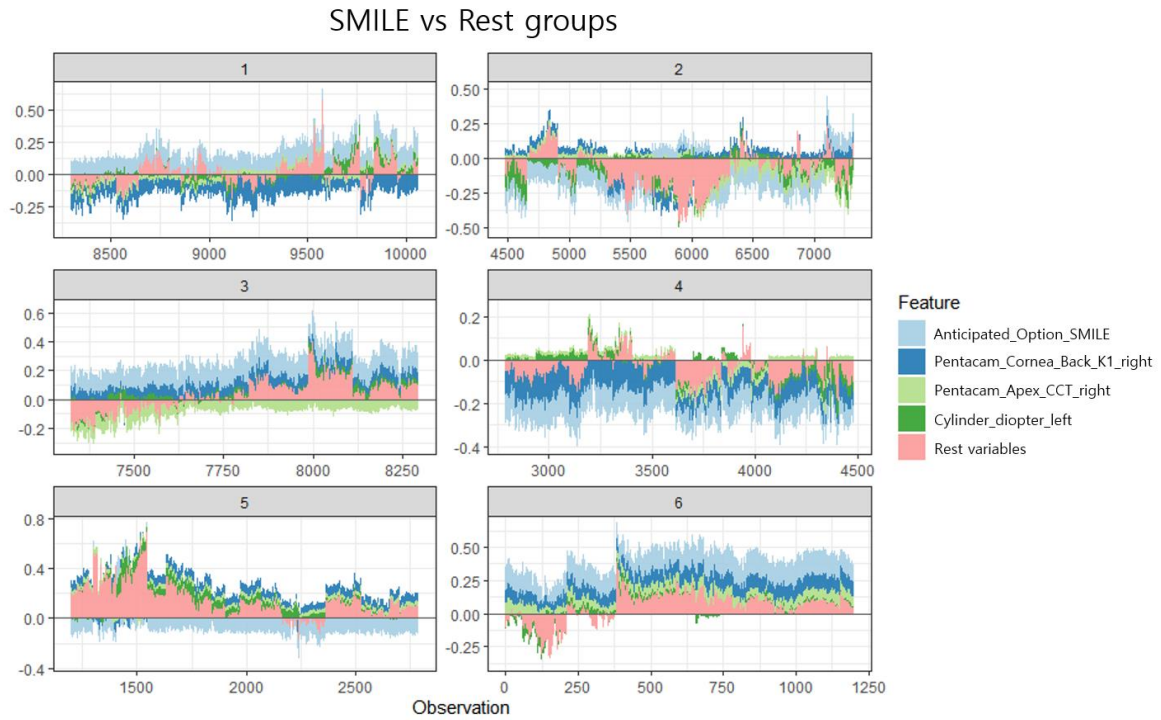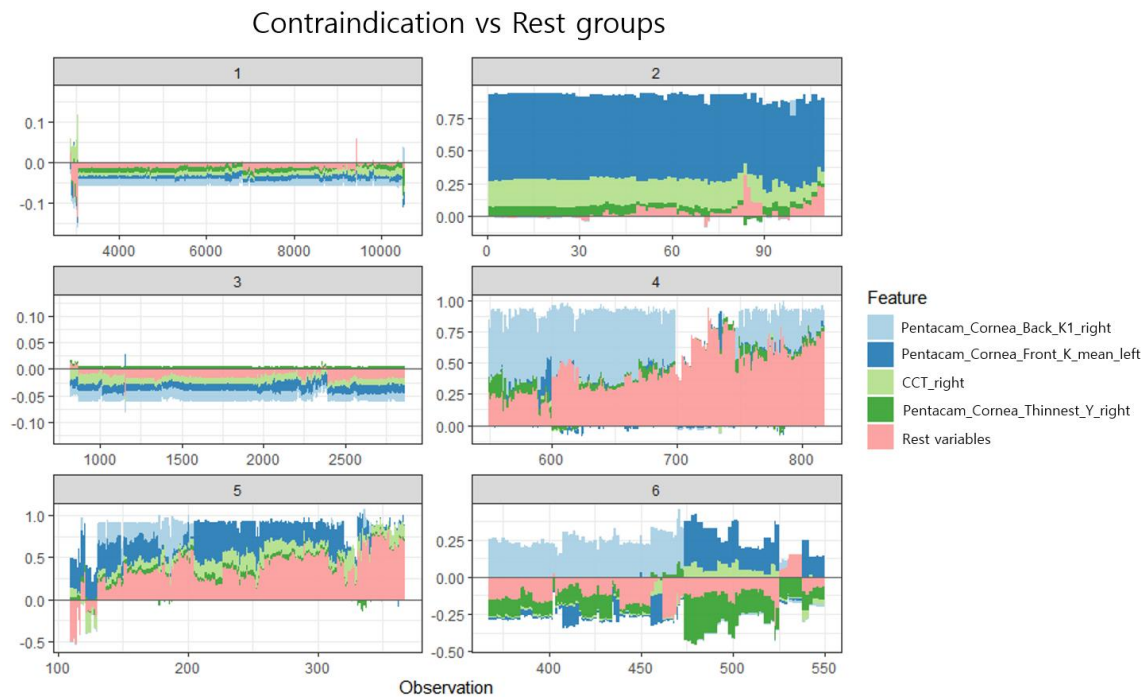

Supplementary Figure 5. Examples of the features with a correlation analysis.

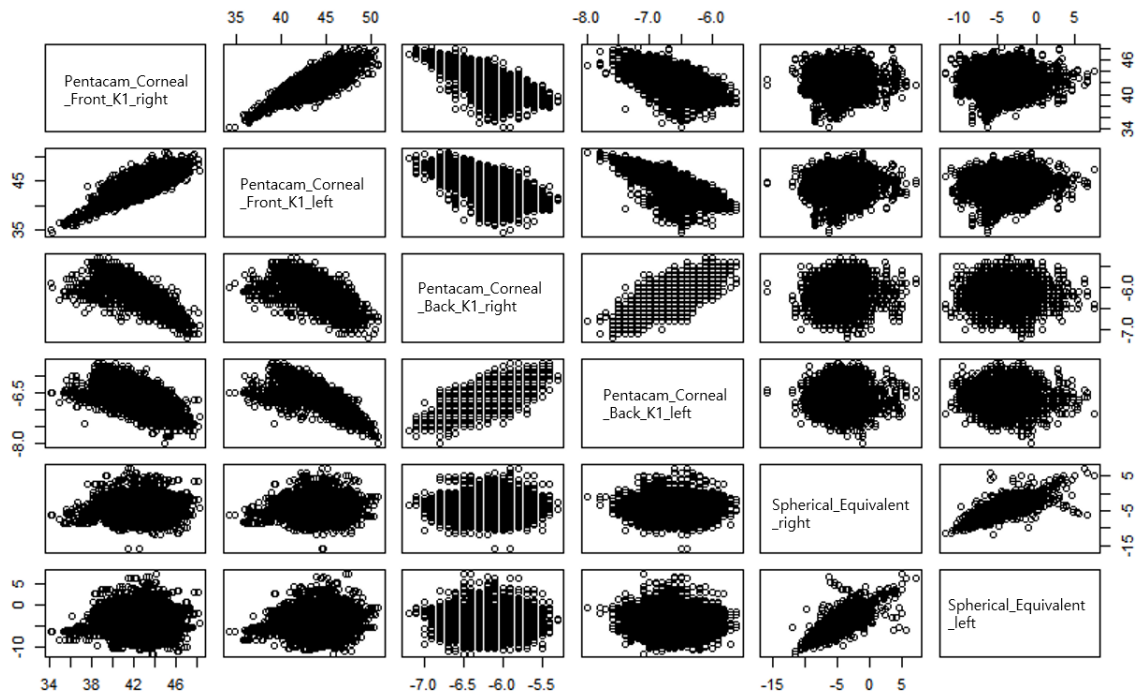

**Supplementary Figure 6.** Examples of the features with the highest importance calculated by XGBoost for two surgeons. Each machine learning model was built by one expert for each unique patient group.

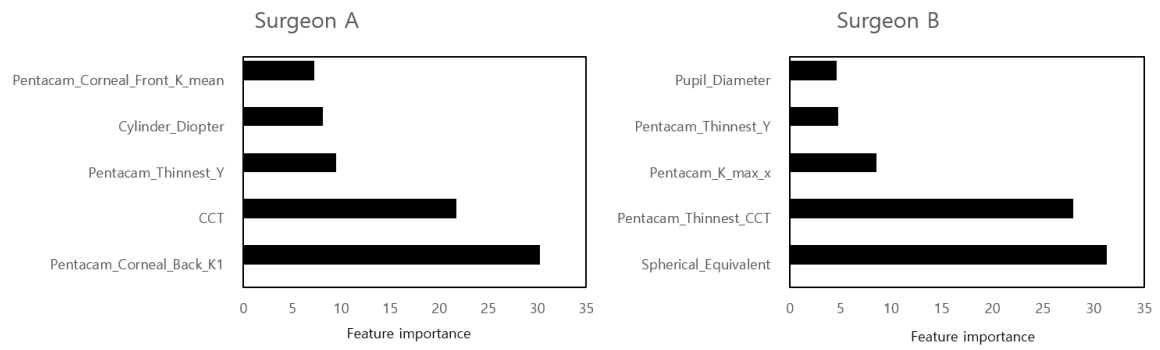

Supplement: tvst-9-2-8_s001.pdf [file tvst-9-2-8_s001.pdf]
